# Supplementary material for: Risk Assessment for the Spread of Flavescence Dorée-Related Phytoplasmas from Alder to Grapevine by Alternative Insect Vectors in Germany
Source: MDPI journal article supplement (doi:10.3390/microorganisms11112766), 2023-11-14
Supplement: s1 [file s1]

## Supplementary Materials

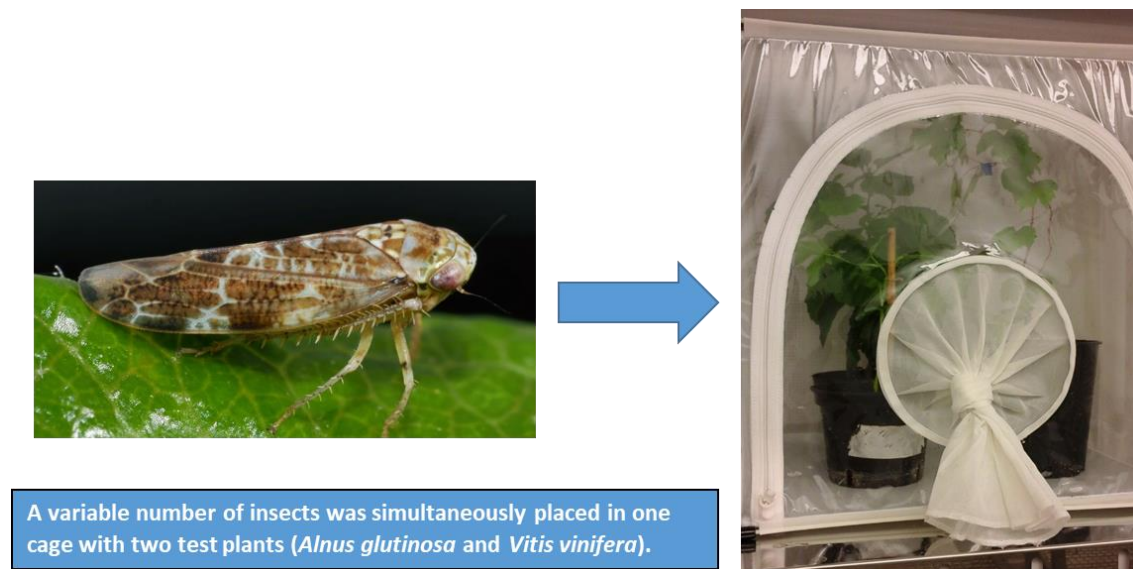

**Figure S1a.** Schematic diagram for a dual choice approach with stwo test plants in the same cage with specimens of *Allygus spp.* or *O. ishidae*, respectively. Dead specimens were sporadically removed from the cage and frozen at -20°C.

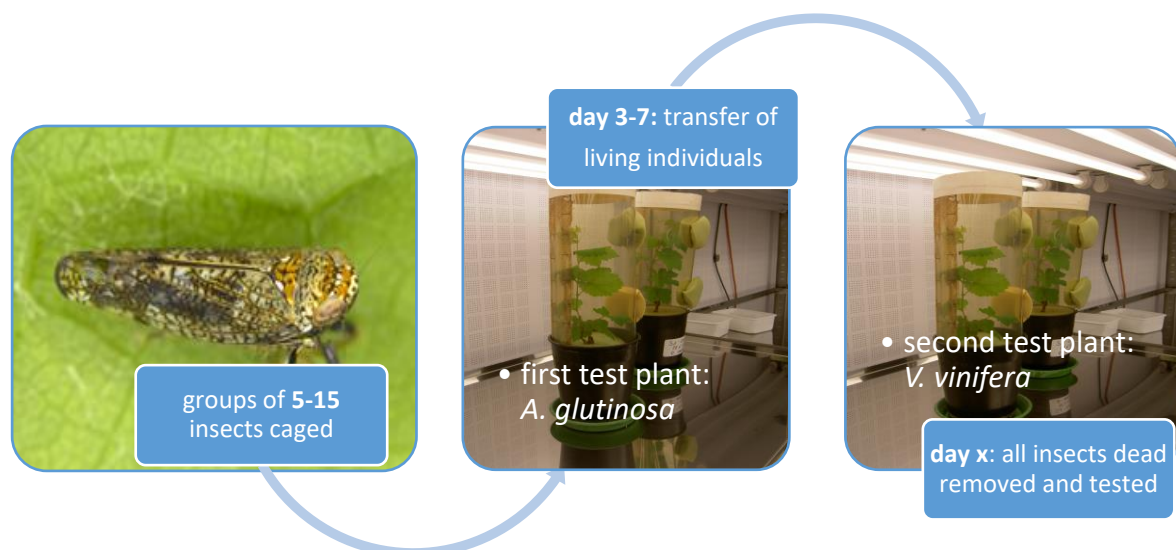

**Figure S1b.** Schematic diagram for a transmission trial assay with transfer of *Allygus spp.* or *O. ishidae* specimens, respectively, among test plants *A. glutinosa* and *V. vinifera*. Dead specimens were sporadically removed from the cage and frozen at -20°C.

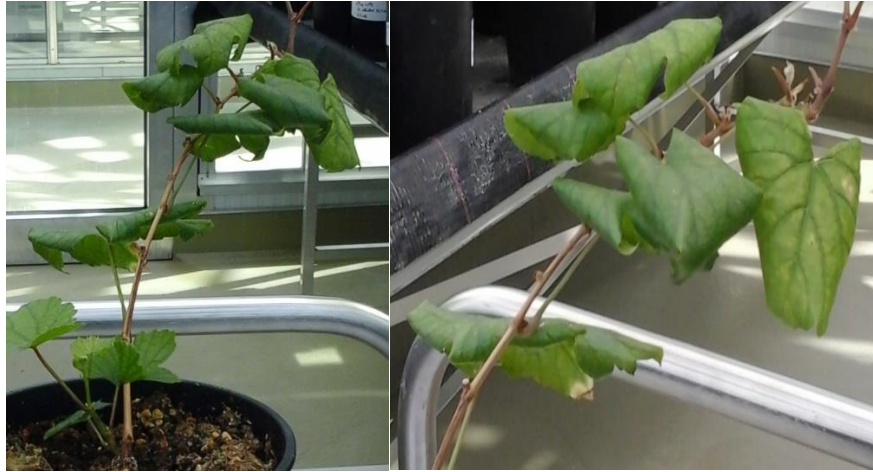

**Figure S2.** Symptom expression of a grapevine plantlet (cultivar 'Scheurebe') three months after inoculation with naturally infected *Orientus ishidae* under controlled conditions.

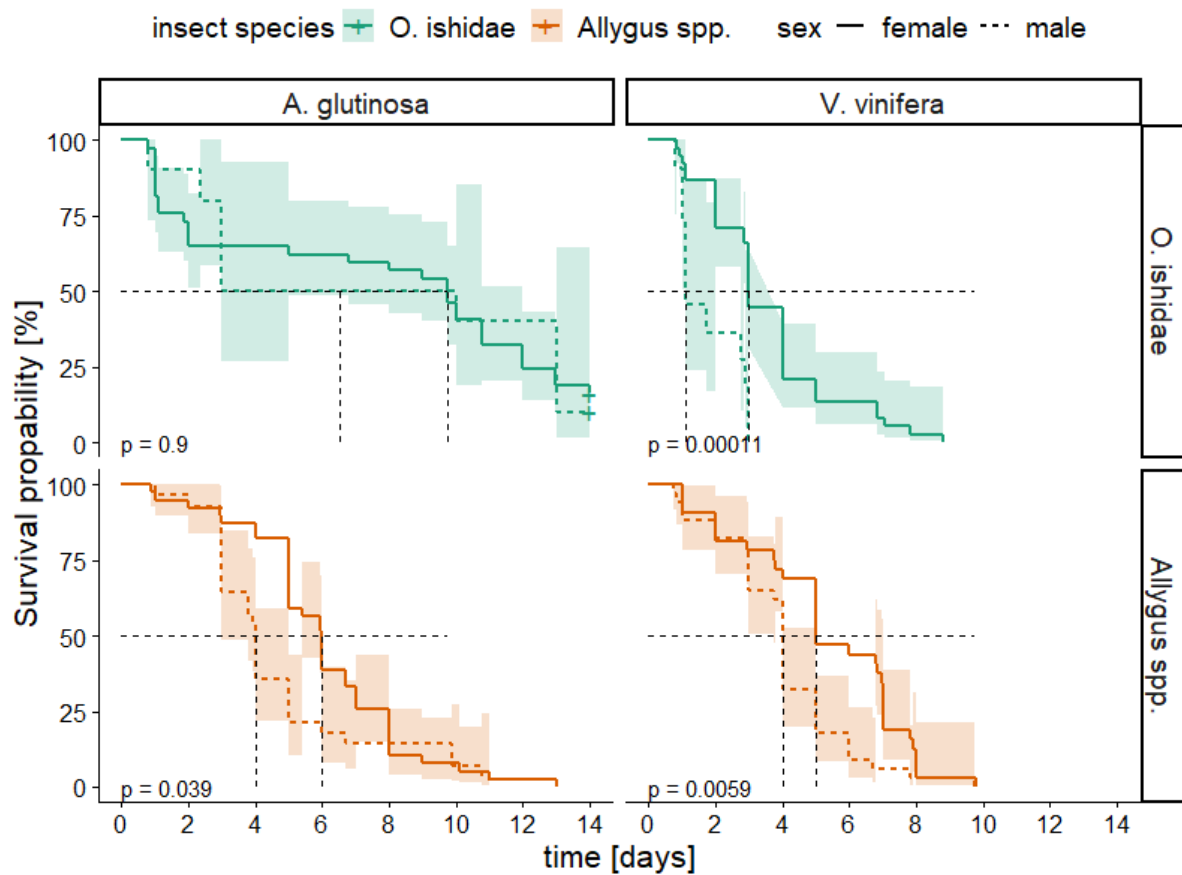

**Figure S3.** Kaplan-Meier survival curves for *Orientus ishidae* (top, green) and *Allygus* spp. (orange; bottom) females (continuous line) and males (dashed line) on two different test plants: (left) *Alnus glutinosa* ( $n_{orientus\_females} = 37$ ,  $n_{orientus\_males} = 10$ ,  $n_{allygus\_females} = 39$ ,  $n_{allygus\_males} = 28$ ) and (right) *Vitis vinifera* ( $n_{orientus\_females} = 38$ ,  $n_{orientus\_males} = 11$ ,  $n_{allygus\_females} = 32$ ,  $n_{allygus\_males} = 34$ ). 95% confidence intervals are reported by transparency. Censored data are marked with a plus (+). P-values < 0.05 represent significant differences between insect sexes according to Log-rank test with Bonferroni correction. Dashed black line indicate median survival time (i.e., time when 50% of the insects are still alive).
